# Supplementary material for: AI-Radiomics Can Improve Inclusion Criteria and Clinical Trial Performance
Source: Tomography. 2022 Feb 2;8(1):341–55. doi: 10.3390/tomography8010028 (PMC8880510; doi:10.3390/tomography8010028)
Supplement: Supplementary file 1 [file tomography-08-00028-s001.zip › Supplementary Table S3.xlsx]

## Sheet: Table 2
	Clinical covariate name	p Evo	HR Evo	HR Evo 95% CI	p Dox	HR Dox	HR Dox 95% CI	Radiomic feature name	p Evo	HR Evo	HR Evo 95% CI	p Dox	HR Dox	HR Dox 95% CI
	Age	0.263431	0.990328	(0.974-1.01)	0.956249	0.999574	(0.984-1.01)	F70.Volume_density_approximate_enclosing_ellipsoid	0.710514	3.3	(0.5-99.6)	0.706519	0.634	(0.142-2.83)
	Sex	0.616662	1.12329	(0.713-1.77)	0.438122	1.20616	(0.751-1.94)	F71.Area_density_approximate_enclosing_ellipsoid	0.87572	5.9	(0.328-7.84)	0.135523	2.26	(0.898-5.71)
	Histology (vs Leiomyosarcoma)	0.312501			0.00969795			F72.Volume_density_minimum_volume_enclosing_ellipsoid	0.9391	1.88	(0.249-8.06)	0.270328	0.263	(0.0367-1.89)
	Ephiteloid		0.191556	(0.684-39.849)		0.885217	(0.264-4.825)	F73.Area_density_minimum_volume_enclosing_ellipsoid	0.87572	16.2	(0.138-47)	0.534615	2.27	(0.296-17.4)
	Liposarcoma		1.05767	(0.367-2.436)		1.05522	(0.283-3.175)	F74.Volume_density_convex_hull	0.9391	0.993	(0.0907-26.5)	0.116299	0.148	(0.0238-0.928)
	Malignant peripheral nerve sheath tumor		0.734143	(0.48-3.865)		0.124982	(2.679-23.895)	F75.Area_density_convex_hull	0.95092	35.4	(0.0214-106)	0.160993	5.53	(0.831-36.8)
	Myxofibrosarcoma		3.24025	(0.042-2.265)		1.16149	(0.201-3.686)	F76.Number_of_connected_3D_components	0.710514	1.43	(0.167-1.83)	0.101293	1.21	(1.02-1.44)
	Pleomorphic rhabdomyosarcoma		N.E.	N.E.		0.892805	(0.15-8.337)	F77.Asymmetry	0.912251	7.22	(0.0318-7.89)	0.628244	0.426	(0.0286-6.37)
	Pleomorphic sarcoma/Malignant fibrous histocytoma		1.55746	(0.315-1.309)		0.382048	(1.253-5.468)	F78.Eccentricity	0.87572	3.03	(0.113-3.2)	0.581695	0.573	(0.115-2.86)
	Other		0.818495	(0.713-2.093)		0.5937	(0.942-3.012)	F79.Orientation	0.96266	1.56	(0.804-1.29)	0.270328	1.15	(0.882-1.51)
	Smoking History (vs. Never Smoked)	0.231638			0.0373599			F80.CoM_x_.pxl.	0.710514	1	(0.998-1)	0.472839	1	(0.999-1)
	Ex/Current Smoker		0.755594	(0.477-1.2)		1.65659	(1.03-2.66)	F81.CoM_y_.pxl.	0.710514	1	(0.997-1)	0.745345	1	(0.998-1)
	Primary Tum Site (vs. Extremity)	0.518284			0.525289			F82.CoM_z_.pxl.	0.710514	1	(1-1)	0.417279	1	(1-1)
	Head/neck		0.838653	(0.491-2.894)		0.768007	(0.457-3.711)	F86.Weighted_CoM_x_.mm.	0.710514	1	(0.998-1)	0.499103	1	(0.999-1)
	Retroperitoneum		1.28129	(0.367-1.658)		1.98295	(0.195-1.302)	F87.Weighted_CoM_y_.mm.	0.759886	1	(0.997-1)	0.884034	1	(0.998-1)
	Visceral		0.926686	(0.583-1.996)		0.964412	(0.539-1.995)	F88.Weighted_CoM_z_.mm.	0.710514	1	(1-1)	0.419024	1	(1-1)
	Other		1.5342	(0.356-1.193)		1.29726	(0.425-1.398)	F92.avgCoocurrence_Joint_MAX	0.630228	272	(0.877-79)	0.0292207	22.4	(2.03-248)
	Tumor Grade (vs. High Grade)	0.272249			0.0501124			F95.avgCoocurrence_Joint_entropy	0.87572	0.965	(0.816-1.11)	0.0604039	0.822	(0.684-0.988)
	Intermediate Grade		1.23848	(0.478-1.364)		1.5346	(0.366-1.159)	F96.avgCoocurrence_Difference_average	0.710514	0.902	(0.802-1.04)	0.0155223	0.767	(0.638-0.922)
	Intermediate/High		0.250454	(0.536-29.73)		0.263698	(0.907-15.858)	F98.avgCoocurrence_Difference_entropy	0.87572	0.763	(0.666-1.24)	0.00823665	0.539	(0.37-0.786)
	Stage (vs. Stage III)	0.023894			0.00293148			F102.avgCoocurrence_Angular_second_moment	0.710514	76200	(0.144-1990)	0.0353029	409	(2.89-57900)
	Stage I		1.11249	(0.214-3.776)		0.503343	(0.749-5.268)	F104.avgCoocurrence_Dissimilarity	0.710514	0.902	(0.802-1.04)	0.0155223	0.767	(0.638-0.922)
	Stage II		0.758264	(0.711-2.445)		0.78563	(0.64-2.533)	F105.avgCoocurrence_Inverse_difference	0.710514	97.7	(0.578-9.09)	0.00619606	15.6	(2.99-81.2)
	Stage IV		0.439869	(1.329-3.889)		0.376761	(1.512-4.66)	F106.avgCoocurrence_Inverse_difference_normalized	0.710514	110000000	(0.198-237000)	0.0155223	25300	(16.1-39700000)
	Metastatic Sites (vs. <2)	0.06			0.02			F107.avgCoocurrence_Inverse_difference_moment	0.710514	51.9	(0.607-6.46)	0.00619606	10.7	(2.61-43.9)
	>=2		1.13517	(0.996-1.294)		1.15366	(0.964-1.38)	F109.avgCoocurrence_Inverse_variance	0.912251	11300	(0.127-29.7)	0.01291	165	(4.9-5580)
	Lung Lesions # (1 vs. >1)	0.841	0.947	(0.541-1.657)	0.125	0.626	(0.343-1.139)	F110.avgCoocurrence_Correlation	0.830257	26.7	(0.395-7.99)	0.112608	4.97	(1.02-24.4)
	ECOG score (1 vs. 0)	0.012918	1.77604	(1.13-2.79)	0.015983	1.85725	(1.15-3.01)	F115.avgCoocurrence_First_measure_of_information_correlation	0.9391	38.7	(0.183-11.2)	0.353735	2.9	(0.291-28.9)
	Prior radiotherapy (yes vs. no)	0.864808	0.961606	(0.613-1.51)	0.0238453	0.565301	(0.345-0.927)	F116.avgCoocurrence_Second_measure_of_information_correlation	0.981244	1.1	(0.0826-12.9)	0.135295	0.124	(0.00772-1.98)
	Prior systemic therapy (yes vs. no)	0.502685	0.708116	(0.258-1.94)	0.893029	1.05206	(0.502-2.2)	F117.avg_3D_SRE_.Short_runs_emphasis.	0.87572	0.119	(0.0669-3.7)	0.00619606	0.0145	(0.00125-0.167)
	Radiomic feature name	p Evo	HR Evo	HR Evo 95% CI	p Dox	HR Dox	HR Dox 95% CI	F118.avg_3D_LRE_.Long_runs_emphasis.	0.710514	1.18	(0.963-1.12)	0.106604	1.09	(1-1.18)
	F1.Statistical_Mean	0.81292	1	(0.999-1)	0.170968	1	(1-1)	F123.avg_3D_LRLGE_.Long_run_low_grey_level_emphasis.	0.710514	311	(0.00295-2.37)	0.222678	13.2	(0.508-341)
	F4.Statistical_SKEW	0.450355	0.882	(0.506-0.951)	0.0311644	0.698	(0.503-0.969)	F124.avg_3D_LRHGE_.Long_run_high_grey_level_emphasis.	0.173136	1	(1-1)	0.200395	1	(1-1)
	F5.Statistical_Kurtosis	0.630228	1.26	(0.996-1.21)	0.0155223	1.13	(1.03-1.25)	F126.avg_3D_GLN_normalize_.Grey_level_non_uniformity_normalised.	0.965207	74000	(0.0118-60)	0.0155223	536	(5.64-50900)
	F6.Statistical_Median	0.710514	1	(0.999-1)	0.170968	1	(1-1)	F128.avg_3D_RLN_normalize_.Run_length_non_uniformity_normalised.	0.710514	0.263	(0.156-1.91)	0.00619606	0.074	(0.0162-0.339)
	F9.Statistical_90th_percentile	0.96487	1	(0.998-1)	0.499103	1	(0.999-1)	F129.avg_3D_RP_.Run_percentage.	0.710514	0.299	(0.1-1.6)	0.00619606	0.0753	(0.0158-0.36)
	F10.Statistical_Maximum_grey_level	0.9391	1	(0.999-1)	0.622768	1	(0.999-1)	F131.avg_3D_RLV_.Run_length_variance.	0.710514	1.28	(0.963-1.26)	0.170968	1.12	(0.977-1.28)
	F19.Statistical_Root_mean_square	0.710514	1	(0.997-1)	0.160993	0.999	(0.997-1)	F133.GLSZM_Small_zone_emphasis	0.96266	0.496	(0.0733-9.76)	0.0502675	0.0257	(0.00161-0.409)
	F22.Intensity_histogram_skewness	0.450355	0.888	(0.496-0.944)	0.0325537	0.701	(0.503-0.976)	F134.GLSZM_Large_zone_emphasis	0.710514	1	(1-1)	0.160993	1	(1-1)
	F23.Intensity_histogram_kurtosis	0.548921	1.27	(1-1.24)	0.0155223	1.14	(1.03-1.25)	F135.GLSZM_Low_grey_level_zone_emphasis	0.897526	11900	(0.00384-23.2)	0.170968	87.5	(0.539-14200)
	F35.Intensity_histogram_coefficient_of_variance	0.710514	0.414	(0.00963-1.72)	0.0438204	0.0314	(0.00148-0.669)	F139.GLSZM_Large_zone_low_grey_level_emphasis	0.710514	1	(1-1)	0.23004	1	(1-1)
	F36.Intensity_histogram_quartile_coefficient_of_dispersion	0.548921	0.271	(0.0145-0.956)	0.0155223	0.0407	(0.00367-0.452)	F140.GLSZM_Large_zone_high_grey_level_emphasis	0.710514	1	(1-1)	0.360596	1	(1-1)
	F37.Intensity_histogram.entropy	0.87572	0.873	(0.702-1.19)	0.0257151	0.662	(0.477-0.917)	F141.GLSZM_Grey_level_non_uniformity	0.173136	1.01	(1-1)	0.00619606	1	(1-1.01)
	F38.Intensity_histogram_uniformity	0.757668	1880	(0.208-64.6)	0.0155223	63.6	(3.05-1330)	F143.GLSZM_Zone_size_non_uniformity	0.173136	1	(1-1)	0.00619606	1	(1-1)
	F44.Volume_at_intensity_fraction_90	0.897526	13.9	(0.276-9.25)	0.581695	1.86	(0.255-13.6)	F144.GLSZM_Zone_size_non_uniformity_normalised	0.9391	0.487	(0.0792-5.94)	0.0502675	0.0225	(0.00125-0.405)
	F45.Intensity_at_volume_fraction_10	0.96266	1	(0.998-1)	0.482337	0.999	(0.997-1)	F145.GLSZM_Zone_percentage	0.710514	0.351	(0.135-1.86)	0.01291	0.0855	(0.0169-0.433)
	F46.Intensity_at_volume_fraction_90	0.710514	1.01	(1-1)	0.081599	1	(1-1)	F147.GLSZM_Zone_size_variance	0.912251	1	(1-1)	0.160993	1	(1-1)
	F47.Volume_at_intensity_fraction_difference	0.9391	4.25	(0.127-4.76)	0.630043	0.579	(0.077-4.35)	F148.GLSZM_Zone_size_entropy	0.710514	2.25	(0.887-2.08)	0.116299	1.44	(0.976-2.13)
	F48.Intensity_at_volume_fraction_difference	0.710514	1	(0.997-1)	0.0597369	0.998	(0.996-1)	F151.NGTDM_Busyness	0.921852	1.04	(0.989-1.01)	0.067363	1.02	(1-1.04)
	F50.Volume_.mm.3.	0.710514	1	(1-1)	0.0155223	1	(1-1)	F153.NGTDM_Strength	0.710514	0.988	(0.932-1.02)	0.0597369	0.935	(0.88-0.993)
	F53.Surface_to_volume_ratio_.mm.2.	0.710514	0.763	(0.285-1.23)	0.0325537	0.398	(0.189-0.837)	radial.deviation.tumor.mean	0.710514	1.03	(0.994-1.02)	0.171095	1.01	(0.997-1.02)
	F54.Compactness_1	0.897526	86100	(6.57E-17-1.01E+28)	0.270328	8.07e-11	(8.29e-26-78500)	radial.deviation.tumor.SD	0.710514	1.04	(0.997-1.04)	0.160993	1.02	(1-1.04)
	F55.Compactness_2	0.9391	2.21	(0.187-11.8)	0.373084	0.385	(0.0669-2.22)	radial.gradient.tumor.mean	0.710514	1	(0.997-1)	0.104259	0.998	(0.996-1)
	F56.Spherical_disproportion	0.790681	3.36	(0.084-2.78)	0.160993	1.79	(0.933-3.41)	radial.gradient.tumor.SD	0.9391	1	(0.997-1)	0.29162	1	(0.997-1)
	F57.Sphericity	0.87572	1.84	(0.0878-90)	0.249639	0.215	(0.0253-1.82)	radial.deviation.tumor.mean..2D.	0.710514	1.03	(0.998-1.02)	0.0882056	1.01	(1-1.02)
	F58.Asphericity	0.790681	3.36	(0.084-2.78)	0.160993	1.79	(0.933-3.41)	radial.deviation.tumor.SD..2D.	0.548921	1.03	(1-1.04)	0.160993	1.02	(1-1.04)
	F64.Elongation	0.87572	8.89	(0.312-8.85)	0.581695	1.75	(0.35-8.72)	radial.gradient.tumor.mean..2D.	0.710514	1	(0.997-1)	0.0604039	0.998	(0.997-1)
	F65.Flatness	0.710514	16.1	(0.511-14.2)	0.310284	2.9	(0.531-15.8)	radial.gradient.tumor.SD..2D.	0.981244	1	(0.997-1)	0.218958	1	(0.997-1)
	F66.Volume_density_axis.aligned_bounding_box	0.95092	8.85	(0.119-14)	0.884034	0.913	(0.0817-10.2)	radial.deviation.border.mean	0.9391	1.01	(0.983-1.01)	0.757911	1	(0.987-1.02)
	F67.Area_density_axis_aligned_bounding_box	0.9391	66.3	(0.0168-21.5)	0.170968	7.8	(0.814-74.7)	radial.deviation.border.SD	0.9391	1.03	(0.981-1.03)	0.491167	1.01	(0.988-1.03)
	F68.Volume_density_oriented_bounding_box	0.945334	9.55	(0.116-15.3)	0.909239	0.978	(0.0867-11)	radial.gradient.border.mean	0.96487	1	(0.998-1)	0.353735	0.999	(0.997-1)
	F69.Area_density_oriented_bounding_box	0.945334	69.7	(0.0163-25.1)	0.160993	8.32	(0.882-78.5)	radial.gradient.border.SD	0.965207	1	(0.996-1)	0.39986	1	(0.996-1)
								radial.deviation.border.mean..2D.	0.945334	1.02	(0.989-1.01)	0.706519	1	(0.991-1.02)
								radial.deviation.border.SD..2D.	0.9391	1.04	(0.985-1.02)	0.258211	1.01	(0.99-1.03)
								radial.gradient.border.mean..2D.	0.965207	1	(0.998-1)	0.250208	0.999	(0.997-1)
								radial.gradient.border.SD..2D.	0.95092	1	(0.996-1)	0.482337	1	(0.996-1)
